# Supplementary material for: Synthesis of porous silica with hierarchical structure directed by a silica precursor carrying a pore-generating cage
Source: Royal Society of Chemistry journal article supplement (doi:10.1039/b810295c), 2008-01-01
Supplement: b810295c.pdf [file b810295c.pdf]

## **Supporting Information**

# **Synthesis of Porous Silica with Hierarchical Structure Directed by a Silica Precursor Carrying a Pore-Generating Cage**

**Whirang Cho, Bong Jun Cha, Hyung Ik Lee<sup>†</sup>, Ji Man Kim<sup>†</sup> and Kookheon Char\***

School of Chemical and Biological Engineering  
Center for Functional Polymer Thin Films  
Seoul National University,  
San 56-1, Shillim-dong, Kwanak-gu, Seoul 151-744, Korea

<sup>†</sup>Department of Chemistry, Sungkyunkwan University  
Chunchun-dong, Jangan-gu, Suwon 440-746, Korea

\* To whom correspondence should be addressed.

(Tel: +82-2-880-7431; Fax: +82-2-873-1548; E-mail: khchar@plaza.snu.ac.kr)

Table S1. Physicochemical properties of porous silicas (T7g1) prepared at different aging time obtained from the N<sub>2</sub> adsorption-desorption isotherms.

| Aging time (day) | Surface area <sup>a</sup> (m <sup>2</sup> g <sup>-1</sup> ) | Pore volume <sup>b</sup> (cm <sup>3</sup> g <sup>-1</sup> ) | Pore diameter <sup>c</sup> (nm) | Unit cell parameter <sup>d</sup> (nm) | Wall thickness <sup>e</sup> (nm) |
|------------------|-------------------------------------------------------------|-------------------------------------------------------------|---------------------------------|---------------------------------------|----------------------------------|
| 1                | 611                                                         | 0.66                                                        | 8.0                             | 13.2                                  | 5.2                              |
| 2                | 534                                                         | 0.63                                                        | 7.9                             | 13.3                                  | 5.4                              |
| 3                | 467                                                         | 0.71                                                        | 8.3                             | 13.6                                  | 5.3                              |

<sup>a</sup> Surface area calculated with the BET method from N<sub>2</sub> adsorption. <sup>b</sup> Total pore volume calculated at p/p<sub>0</sub> = 0.974. <sup>c</sup> Pore diameter calculated by the BJH method. <sup>d</sup> Unit cell parameter obtained from SAXS results. <sup>e</sup> wall thickness = d - c.

**Table S1 (Cho *et al.*)**

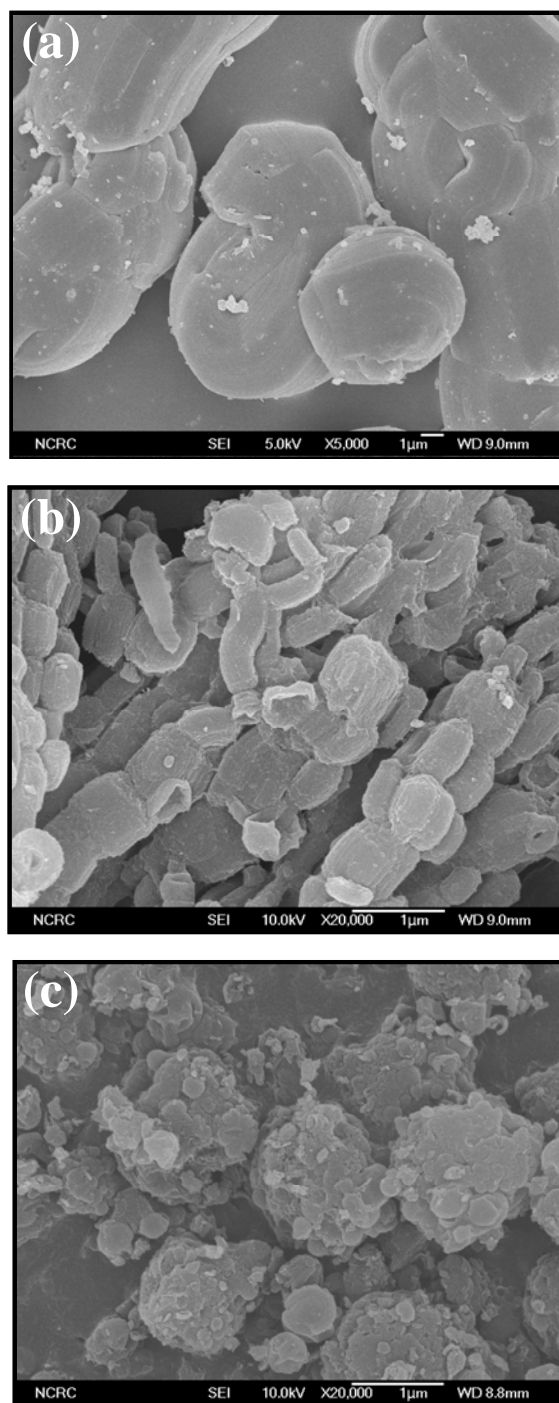

Figure S1: Scanning Electron Microscopy images of calcined porous silicas prepared with: (a) TEOS only (T10); (b) adam-graft SQ introduced first followed by the addition of TEOS; (c) a mixture of TEOS and adam-grafted SQ added simultaneously.

**Figure S1 (Cho *et al.*)**

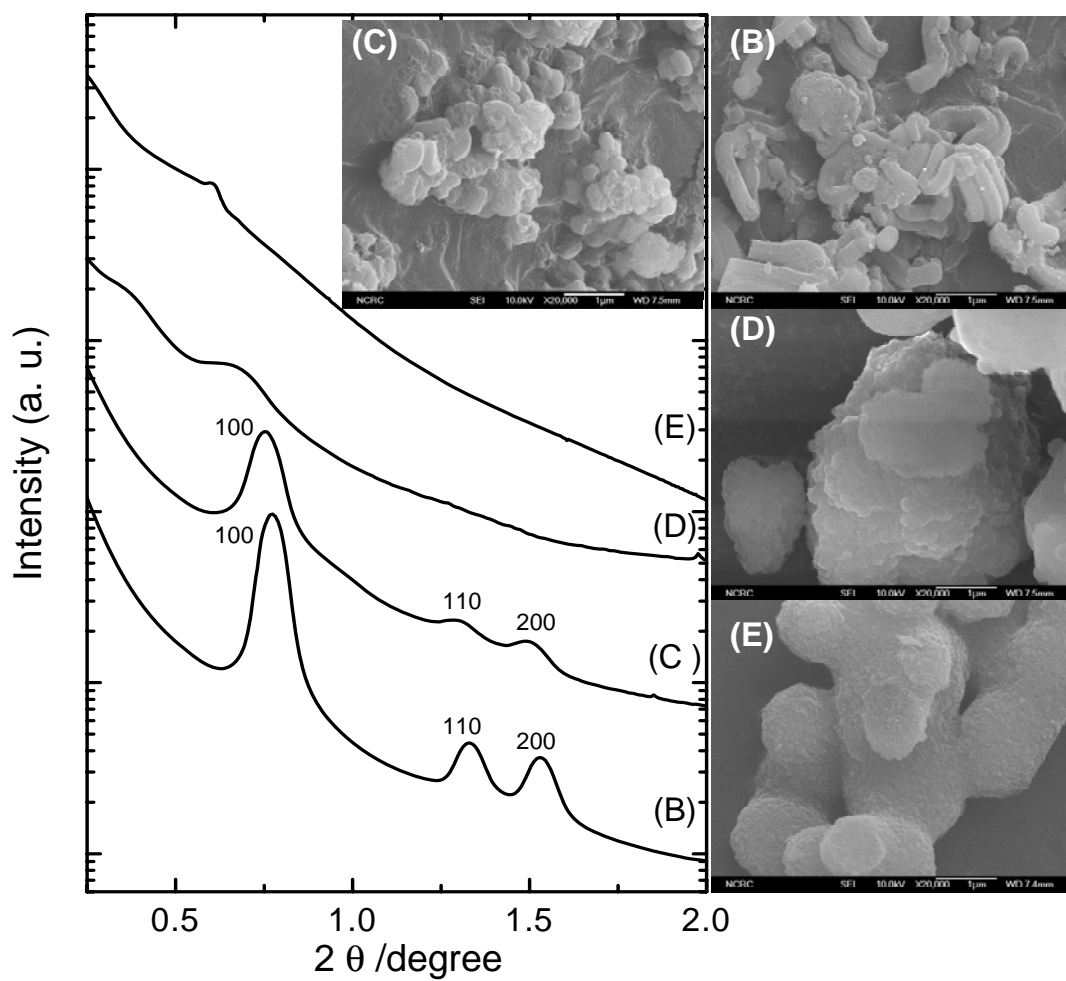

Figure S2: Small angle X-ray scattering patterns and FE-SEM images of porous silicas synthesized with varying the molar ratios between TEOS and adam-graft SQ in the presence of a triblock Pluronic P123 ( $\text{EO}_{20}\text{PO}_{70}\text{EO}_{20}$ ;  $M_w = 5,800$ ) template: (B) T7g1; (C) T5g1; (D) T4g1; (E) T3g1. (All scale bars are 1  $\mu\text{m}$ .)

**Figure S2 (Cho *et al.*)**
